# Supplementary material
Source: Springer Nature journal article supplement (https://www.springerprofessional.de/resource/supplementary/13638_2013_1040_MOESM10_ESM.pdf/11899112)

Multi-hop synchronization error of TTS

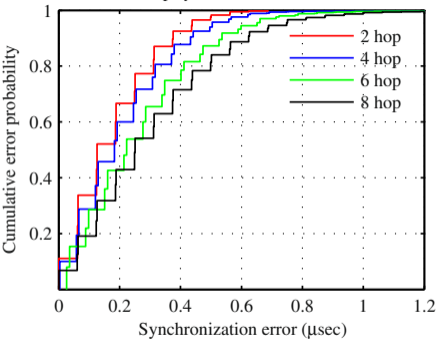

(a)

Multi-hop synchronization error of R-RS

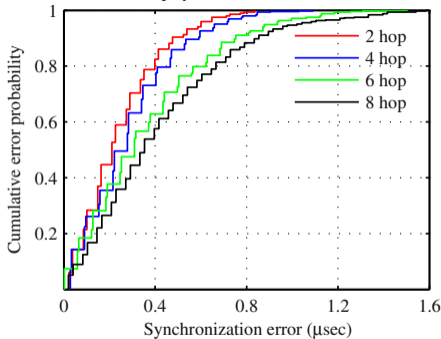

(b)

Supplement: MOESM10 [file 11899112]
